# Supplementary material for: Seasonal trends in the wintertime photochemical regime of the Uinta Basin, Utah, USA
Source: Copernicus journal article supplement (doi:10.5194/acp-25-11261-2025), 2025-09-25
Supplement: Supplementary file [file acp-25-11261-2025-supplement-title-page.pdf › acp-25-11261-2025-supplement-title-page.pdf]

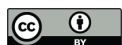

## *Supplement of*

# **Seasonal trends in the wintertime photochemical regime of the Uinta Basin, Utah, USA**

**Marc L. Mansfield and Seth N. Lyman**

*Correspondence to:* Marc L. Mansfield ([marc.mansfield@usu.edu](mailto:marc.mansfield@usu.edu))

- [acp-25-11261-2025-supplement-title-page.pdf](#)
- Supplemental File
  - Sample Calculation
    - \* J16bCO.csv
    - \* J16bNO.csv
    - \* J16bNO2.csv
    - \* J16bP.csv
    - \* J16bRH.csv
    - \* J16bT.csv
    - \* J16bTime.csv
    - \* J16b\_ATB.m
    - \* J16b\_ATB\_RH.csv
    - \* J16b\_ATB\_T.csv
    - \* J16bkdil.csv
    - \* zero.csv
  - UB Photochemical Regime Supplementary File.pdf

The copyright of individual parts of the supplement might differ from the article licence.
